# Supplementary material for: HYPofractionated Adjuvant RadioTherapy in 1 versus 2 weeks in high-risk patients with breast cancer (HYPART): a non-inferiority, open-label, phase III randomised trial
Source: Springer Nature journal article supplement (doi:10.1186/s13063-023-07851-7), 2024-01-02

Gantt chart

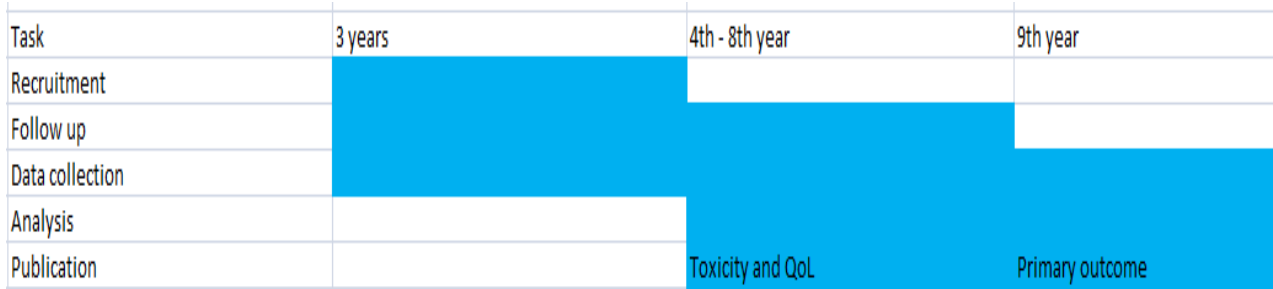

Supplement: MOESM2 [file 13063_2023_7851_MOESM2_ESM.pdf]
